# Supplementary material
Source: Springer Nature journal article supplement (https://www.springermedizin.de/resource/supplementary/12874_2008_325_MOESM1_ESM.pdf/9434404)
Supplement: MOESM1 [file 9434404]

## Sampling for the baseline hazard (step function approach)

The integral in the likelihood contribution of the  $i$ -th observation can be written as

$$\int_0^{t_i} \exp[h(s)] ds = \sum_{k=1}^K \exp h(\theta_{k-1}) [t_i \wedge \theta_k - t_i \wedge \theta_{k-1}] \quad (1)$$

where  $t \wedge s = \min\{t, s\}$ . The total likelihood of the  $n$  observations is given by

$$\begin{aligned} & \prod_{i=1}^n \lambda_0(t_i | \mathbf{x}_i)^{\delta_i} S(t_i | \mathbf{x}_i) \\ &= \exp \left\{ \sum_{i=1}^n \left[ \delta_i [h(t_i) + \boldsymbol{\beta}' \mathbf{x}_i] - e^{\boldsymbol{\beta}' \mathbf{x}_i} \sum_{k=1}^K \exp h(\theta_{k-1}) [t_i \wedge \theta_k - t_i \wedge \theta_{k-1}] \right] \right\} \end{aligned} \quad (2)$$

The posterior of  $\mathbf{h}$  is

$$\begin{aligned} \pi(\mathbf{h} | \boldsymbol{\beta}, \tau_0, \tau_1, \text{Data}) &\propto \exp \left\{ -\frac{1}{2} \mathbf{h}' \boldsymbol{\Sigma}^{-1} \mathbf{h} \right. \\ &\left. + \sum_{i=1}^n \left[ \delta_i \sum_{k=1}^K h_k \mathbb{I}_{[\theta_{k-1}, \theta_k)}(t_i) - \exp\{\boldsymbol{\beta}' \mathbf{x}_i\} \sum_{k=1}^K \exp(h_k) [t_i \wedge \theta_k - t_i \wedge \theta_{k-1}] \right] \right\} \end{aligned} \quad (3)$$

This is not a GMRF because of the term  $\exp(h_k)$ . But this term can be approximated in a neighborhood of  $h_k$  as

$$\exp(h'_k) \approx A_i + B_i h'_k + \frac{1}{2} C_i h'^2_k \quad (4)$$

This gives the following GMRF as the proposal density

$$\begin{aligned} q(\mathbf{h}' | \mathbf{h}) &\propto \frac{1}{Z(\mathbf{h})} \exp \left\{ -\frac{1}{2} \mathbf{h}' \boldsymbol{\Sigma}^{-1} \mathbf{h} + \sum_{i=1}^n \left[ \delta_i \sum_{k=1}^K h_k \mathbb{I}_{[\theta_{k-1}, \theta_k)}(t_i) \right. \right. \\ &\quad \left. \left. - \exp\{\boldsymbol{\beta}' \mathbf{x}_i\} \sum_{k=1}^K (B_i h'_k + \frac{1}{2} C_i h'^2_k) [t_i \wedge \theta_k - t_i \wedge \theta_{k-1}] \right] \right\} \\ &= \exp \left\{ -\frac{1}{2} \mathbf{h}' \mathbf{Q} \mathbf{h} + \mathbf{b}' \mathbf{h} \right\} \end{aligned} \quad (5)$$

with

$$\mathbf{b} = \left( \sum_{i=1}^n [\delta_i \mathbb{I}_{[\theta_{k-1}, \theta_k)}(t_i) - \exp\{\boldsymbol{\beta}' \mathbf{x}_i\} B_i [t_i \wedge \theta_k - t_i \wedge \theta_{k-1}]] \right)_{k=1, \dots, K} \quad (6)$$

$$\mathbf{Q} = \text{diag} \left( -\sum_{i=1}^n \exp\{\boldsymbol{\beta}' \mathbf{x}_i\} C_i [t_i \wedge \theta_k - t_i \wedge \theta_{k-1}] \right) - \boldsymbol{\Sigma}^{-1} \quad (7)$$

One can sample easily from (5), see Rue 2001 [25]. One has to compute the band Cholesky decomposition of the precision matrix  $\mathbf{Q} = \mathbf{L}\mathbf{L}'$ , to solve  $\mathbf{L}\mathbf{v} = \mathbf{b}$ ,  $\mathbf{L}'\boldsymbol{\mu} = \mathbf{v}$  and  $\mathbf{L}'\mathbf{y} = \mathbf{z}$ , where  $\mathbf{z}$  is a vector of independent standard Gaussian variables. The sample is the sum  $\mathbf{x} = \boldsymbol{\mu} + \mathbf{y}$ .

$Z(\mathbf{h})$  is the normalizing constant which depends on  $\mathbf{h}$  by the coefficients  $\{C_i\}$ . The acceptance probability for the Metropolis-Hastings step is  $\min(1, R)$ , where

$$R = \frac{\pi(\mathbf{h}'|\boldsymbol{\beta}, \tau_0, \tau_1, \text{Data}) q(\mathbf{h}|\mathbf{h}')}{\pi(\mathbf{h}|\boldsymbol{\beta}, \tau_0, \tau_1, \text{Data}) q(\mathbf{h}'|\mathbf{h})} \quad (8)$$

To improve the performance of the Metropolis-Hastings step it is recommended not to use the Taylor expansion around  $h_k$  in equation (4) but to provide an overall good fit to the full conditional for  $\mathbf{h}$  in the region where  $\mathbf{h}'$  is expected to be located. Therefore one can use the approximation given by

$$(A_i, B_i, C_i) = \arg \min \left[ \int_{h_k-d}^{h_k+d} \left\{ \exp(h'_k) - (A_i + B_i h'_k + \frac{1}{2} C_i h'^2_k) \right\}^2 dh'_k \right] \quad (9)$$

where  $d$  is a crude guess of the step length of  $h_k$  to  $h'_k$ .
